# Supplementary material for: Genome-Wide Association Study towards Genomic Predictive Power for High Production and Quality of Milk in American Alpine Goats
Source: Int J Genomics. 2020 Jul 26;2020:6035694. doi: 10.1155/2020/6035694 (PMC7403911; doi:10.1155/2020/6035694)
Supplement: Supplementary Materials — PLINK_060317_0949 iSelect p1-5 (Yonathan goat p1-5) 2017-03-03.bat iSelect p1-5 (Yonathan goat p1-5) 2017-03-03.map iSelect p1-5 (Yonathan goat p1-5) 2017-03-03.ped iSelect p1-5 (Yonathan goat p1-5) 2017-03-03.phenotype iSelect p1-5 (Yonathan goat p1-5) 2017-03-03.script Tilahun goat 276 iselect 2017-03-03_concordance.xlsx Tilahun goat 276 iselect 2017-03-03_DNAReport.csv Tilahun goat 276 iselect 2017-03-03_FinalReport.txt Tilahun goat 276 iselect 2017-03-03_FinalReportMatrixTopStrand.txt Tilahun goat 276 iselect 2017-03-03_IDs.csv Tilahun goat 276 iselect 2017-03-03_LocusSummary.csv Tilahun goat 276 iselect 2017-03-03_LocusXDNA.csv. [file 6035694.f1.zip]

Archive with 13 entries (13 files):
- 6035694.f1._PLINK_060317_0949
- 6035694.f10.txt
- 6035694.f11.csv
- 6035694.f12.csv
- 6035694.f13.csv
- 6035694.f2.bat
- 6035694.f3.map
- 6035694.f4.ped
- 6035694.f5.phenotype
- 6035694.f6.script
- 6035694.f7.xlsx
- 6035694.f8.csv
- 6035694.f9.txt
